# Supplementary material for: Constitutive activation of CTNNB1 results in a loss of spermatogonial stem cell activity in mice
Source: PubMed Central journal article supplement (PMC8136708; doi:10.1371/journal.pone.0251911), 2021-05-20

Fig S1, raw\_image

PCR products were analyzed using a 2% agarose gel containing ethidium bromide and photographed under UV illumination.

Figure 1A was generated from this gel

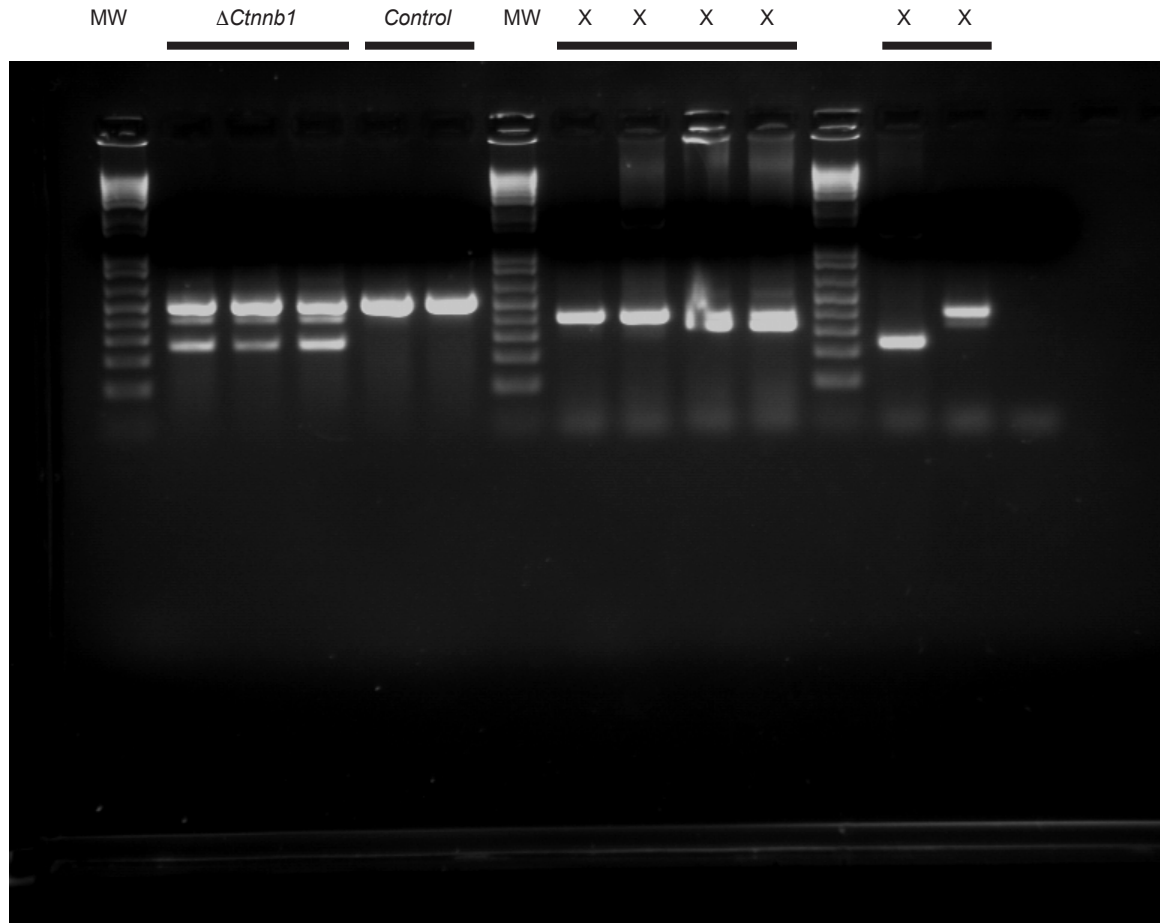

Supplement: pone.0251911.s005.pdf [file pone.0251911.s005.pdf]
